# Supplementary material for: Use of NanoSIMS to Identify the Lower Limits of Metabolic Activity and Growth by Serratia liquefaciens Exposed to Sub-Zero Temperatures
Source: MDPI journal article supplement (doi:10.3390/life11050459), 2021-05-20
Supplement: s1 [file s1]

Article

# Use of NanoSIMS to Identify the Lower Limits of Metabolic Activity and Growth by *Serratia liquefaciens* Exposed to Sub-zero Temperatures

Petra Schwendner <sup>1,\*</sup>, Ann N. Nguyen <sup>2,†</sup> and Andrew C. Schuerger <sup>1</sup>

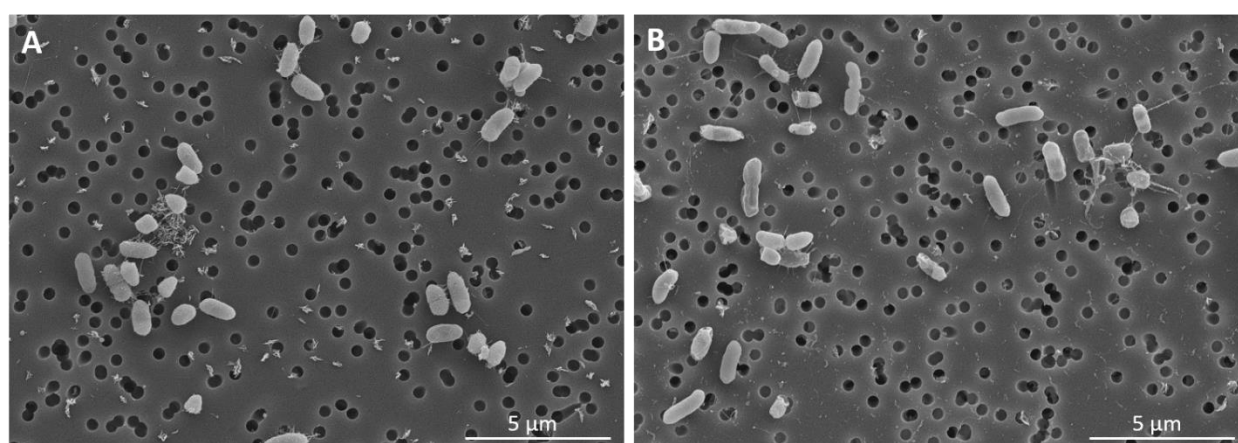

**Figure S1.** Examples of scanning electron microscopy (SEM) images of *Serratia liquefaciens* incubated in labeled Spizizen medium for 35 days at 0°C (A) and −5°C (B).

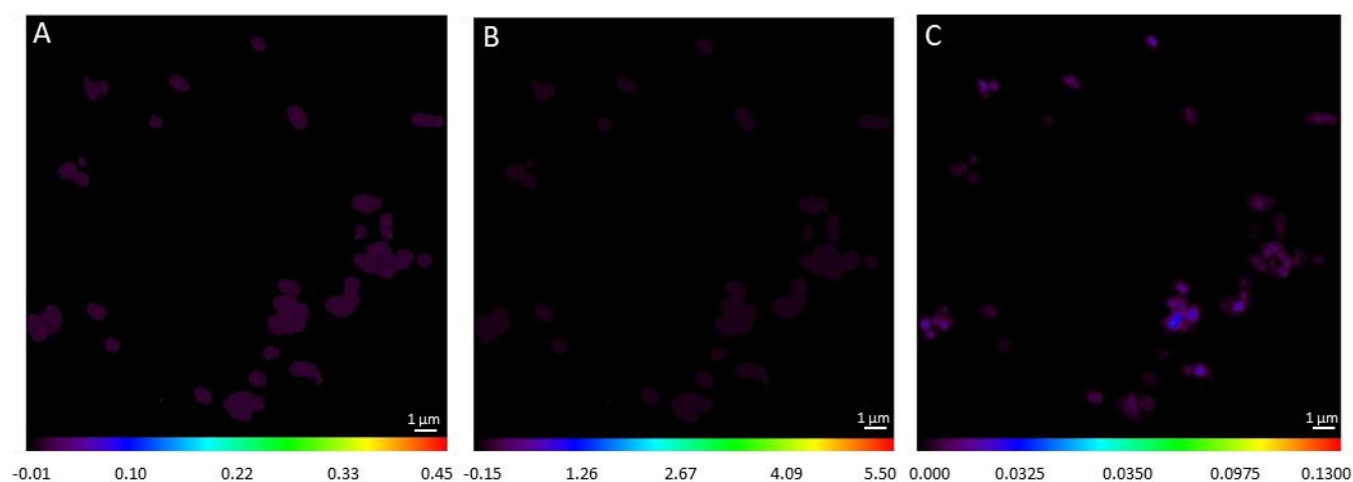

**Figure S2.** NanoSIMS isotopic ratio images of *Serratia liquefaciens* cells incubated for 35 days in 0°C in unlabeled Spizizen medium. (A)  $^{13}\text{C}/^{12}\text{C}$ , (B)  $^{15}\text{N}/^{14}\text{N}$ , and (C)  $^{18}\text{O}/^{16}\text{O}$ .

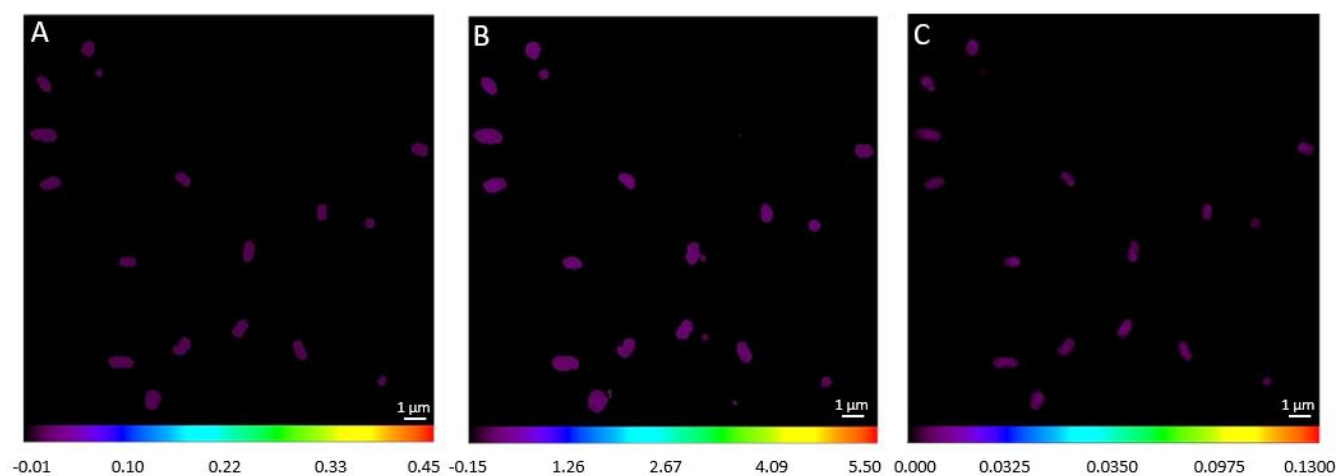

**Figure S3:** NanoSIMS isotope ratio images of UV-killed *S. liquefaciens* cells incubated for 35 days in 0 °C in labeled Spizizen medium with (A)  $^{13}\text{C}/^{12}\text{C}$ , (B)  $^{15}\text{N}/^{14}\text{N}$ , and (C)  $^{18}\text{O}/^{16}\text{O}$ .
